# Supplementary material
Source: publisher figshare collection journal article supplement (https://sage.figshare.com/ndownloader/files/23101460)
Supplement: Supplementary file [file 23101460]

Text-based responses under the Other (please specify) answer choice for Question 7 (See Appendix 1 for the questionnaire):

*"Removing every residents from the hospital, no more clinical exposition. We have to prepare course that they will use in the future instead of making their own teaching's material"*

*"Pedagogical work from home. No teaching. More work on call (all x-ray have to be read)."*

*"Numerous exposure to virtual teaching, self study, resources etc"*

*"Cancel rotations and move to ER coverage from a central site to minimize travel between sites"*

*"Incredible moral support"*

*"Backup call schedules created, weekly RPC meetings to actively address issues"*

*"Our program provides 1-2 hours of daily credits for wellness activities."*

*"junior residents no longer work during daytime"*
